# Supplementary material for: Motivations of Human Helping Behavior towards Dogs
Source: MDPI journal article supplement (doi:10.3390/vetsci9030145), 2022-03-21
Supplement: s1 [file s1]

## Supplementary Information

**Title of Manuscript:**

**Motivations of Human Helping Behavior towards Dogs**

**Serenella d'Ingeo<sup>1§</sup>, Gabriele Ferlisi<sup>2§</sup>, Michele Minunno<sup>1</sup>, Giovanni L. Palmisano<sup>3</sup>, Gianluca Ventriglia<sup>1</sup>,  
Marcello Siniscalchi<sup>1</sup>, Angelo Quaranta<sup>1</sup>**

<sup>1</sup> Animal Physiology and Behavior Unit, Department of Veterinary Medicine, University of Bari Aldo Moro, 70121 Bari, Italy; serenella.dingeo@uniba.it (S.d.); m.minunno79@libero.it (M.M.); marcello.siniscalchi@uniba.it (M.S.); gianluca.ventriglia@uniba.it (G.V.)

<sup>2</sup> Tree of Life Psychological Centre; 70124 Bari, Italy; gabriele.ferlisi@libero.it (G.F.)

<sup>3</sup> Centro Ricerche sullo Stress Interpersonale (CRISI), cooperativa sociale ONLUS; 70125 Bari, Italy; gianluca.palmisano@yahoo.it (G.P.)

<sup>§</sup> These authors contributed equally to this work as first authors.

\* Correspondence: angelo.quaranta@uniba.it (A.Q.); Tel.: +39-080-544-3927

**Table S1.** Differences in the frequencies of activated schemes in the experimental group (GT) and control group (GC). YSQ-L3: Young Schema Questionnaire; f: frequency; n.s.: not significant ( $p>0.05$ ). Chi-squared test of Pearson

| Activated schemes YSQ-L3                  |           | GT (N = 71) | GC (N = 51) | $\chi^2$ | df | p     |
|-------------------------------------------|-----------|-------------|-------------|----------|----|-------|
|                                           |           | f           | f           |          |    |       |
| Emotional Deprivation                     | Very High | 45          | 34          | 2.992    | 3  | n.s.  |
|                                           | High      | 8           | 2           |          |    |       |
|                                           | Medium    | 10          | 6           |          |    |       |
|                                           | Low       | 8           | 9           |          |    |       |
| Abandonment                               | Very High | 7           | 6           | 0.615    | 3  | n.s.  |
|                                           | High      | 9           | 6           |          |    |       |
|                                           | Medium    | 7           | 7           |          |    |       |
|                                           | Low       | 48          | 32          |          |    |       |
| Distrust/Abuse                            | Very High | 4           | 8           | 4.132    | 3  | n.s.  |
|                                           | High      | 7           | 3           |          |    |       |
|                                           | Medium    | 20          | 11          |          |    |       |
|                                           | Low       | 40          | 29          |          |    |       |
| Social exclusion/Alienation               | Very High | 3           | 1           | 0.723    | 3  | n.s.  |
|                                           | High      | 3           | 3           |          |    |       |
|                                           | Medium    | 11          | 9           |          |    |       |
|                                           | Low       | 54          | 38          |          |    |       |
| Inadequacy/Shame                          | Very High | 1           | 0           | 0.941    | 3  | n.s.  |
|                                           | High      | 1           | 1           |          |    |       |
|                                           | Medium    | 3           | 3           |          |    |       |
|                                           | Low       | 66          | 47          |          |    |       |
| Failure                                   | Very High | 0           | 2           | 4.078    | 3  | n.s.  |
|                                           | High      | 4           | 5           |          |    |       |
|                                           | Medium    | 4           | 4           |          |    |       |
|                                           | Low       | 63          | 40          |          |    |       |
| Dependence/Incompetence                   | Very High | 0           | 1           | 2.027    | 3  | n.s.  |
|                                           | High      | 1           | 1           |          |    |       |
|                                           | Medium    | 7           | 3           |          |    |       |
|                                           | Low       | 63          | 46          |          |    |       |
| Vulnerability to disease                  | Very High | 1           | 2           | 0.985    | 3  | n.s.  |
|                                           | High      | 3           | 2           |          |    |       |
|                                           | Medium    | 12          | 10          |          |    |       |
|                                           | Low       | 55          | 37          |          |    |       |
| Entanglement/Underdeveloped self          | Very High | 0           | 2           | 4.391    | 3  | n.s.  |
|                                           | High      | 5           | 1           |          |    |       |
|                                           | Medium    | 12          | 8           |          |    |       |
|                                           | Low       | 54          | 40          |          |    |       |
| Submission                                | Very High | 2           | 1           | 9.498    | 3  | < .05 |
|                                           | High      | 0           | 6           |          |    |       |
|                                           | Medium    | 6           | 6           |          |    |       |
|                                           | Low       | 63          | 38          |          |    |       |
| Self-sacrifice                            | Very High | 16          | 8           | 3.759    | 3  | n.s.  |
|                                           | High      | 26          | 17          |          |    |       |
|                                           | Medium    | 12          | 16          |          |    |       |
|                                           | Low       | 17          | 10          |          |    |       |
| Emotional inhibition                      | Very High | 2           | 4           | 3.122    | 3  | n.s.  |
|                                           | High      | 6           | 5           |          |    |       |
|                                           | Medium    | 8           | 9           |          |    |       |
|                                           | Low       | 55          | 33          |          |    |       |
| Strict Standards /Hypercriticism          | Very High | 8           | 8           | 0.732    | 3  | n.s.  |
|                                           | High      | 14          | 11          |          |    |       |
|                                           | Medium    | 17          | 12          |          |    |       |
|                                           | Low       | 32          | 20          |          |    |       |
| Claims/Grandiosity                        | Very High | 4           | 7           | 5.389    | 3  | n.s.  |
|                                           | High      | 8           | 8           |          |    |       |
|                                           | Medium    | 18          | 6           |          |    |       |
|                                           | Low       | 41          | 30          |          |    |       |
| Insufficient Self-control/self-discipline | Very High | 8           | 2           | 5.592    | 3  | n.s.  |
|                                           | High      | 2           | 6           |          |    |       |
|                                           | Medium    | 11          | 8           |          |    |       |
|                                           | Low       | 41          | 30          |          |    |       |
| Search for Approval/ Acknowledgment       | Very High | 2           | 1           | 4.829    | 3  | n.s.  |
|                                           | High      | 2           | 1           |          |    |       |
|                                           | Medium    | 3           | 8           |          |    |       |
|                                           | Low       | 64          | 41          |          |    |       |
| Negativity/Pessimism                      | Very High | 2           | 3           | 2.501    | 3  | n.s.  |
|                                           | High      | 7           | 4           |          |    |       |
|                                           | Medium    | 7           | 9           |          |    |       |
|                                           | Low       | 55          | 35          |          |    |       |
| Punishment                                | Very High | 4           | 3           | 3.719    | 3  | n.s.  |
|                                           | High      | 10          | 2           |          |    |       |
|                                           | Medium    | 16          | 15          |          |    |       |
|                                           | Low       | 41          | 31          |          |    |       |

**Table S2.** Differences in the frequency of activated schemes in the group with high level of irrational beliefs (A-IRR) and low level of irrational beliefs (B-IRR). YSQ-L3: Young Schema Questionnaire; f: frequency; n.s.: not significant ( $p>0.05$ ). Chi-squared test of Pearson.

| Activated schemes YSQ-L3                  |           | A-IRR (N = 61) | B-IRR (N = 61) | $\chi^2$ | df | p       |
|-------------------------------------------|-----------|----------------|----------------|----------|----|---------|
|                                           |           | f              | f              |          |    |         |
| Emotional Deprivation                     | Very High | 5              | 5              | 6,061    | 3  | n.s.    |
|                                           | High      | 12             | 4              |          |    |         |
|                                           | Medium    | 10             | 7              |          |    |         |
|                                           | Low       | 34             | 45             |          |    |         |
| Abandonment                               | Very High | 11             | 2              | 22,64    | 3  | < .001  |
|                                           | High      | 13             | 2              |          |    |         |
|                                           | Medium    | 9              | 5              |          |    |         |
|                                           | Low       | 28             | 52             |          |    |         |
| Distrust/Abuse                            | Very High | 10             | 2              | 14,293   | 3  | < .005  |
|                                           | High      | 9              | 1              |          |    |         |
|                                           | Medium    | 13             | 18             |          |    |         |
|                                           | Low       | 29             | 40             |          |    |         |
| Social exclusion/Alienation               | Very High | 4              | 0              | 14,583   | 3  | < .005  |
|                                           | High      | 6              | 0              |          |    |         |
|                                           | Medium    | 13             | 7              |          |    |         |
|                                           | Low       | 38             | 54             |          |    |         |
| Inadequacy/Shame                          | Very High | 1              | 0              | 3,888    | 3  | n.s.    |
|                                           | High      | 2              | 0              |          |    |         |
|                                           | Medium    | 4              | 2              |          |    |         |
|                                           | Low       | 54             | 59             |          |    |         |
| Failure                                   | Very High | 2              | 0              | 14,962   | 3  | < .005  |
|                                           | High      | 7              | 2              |          |    |         |
|                                           | Medium    | 8              | 0              |          |    |         |
|                                           | Low       | 44             | 59             |          |    |         |
| Dependence/Incompetence                   | Very High | 1              | 0              | 7,343    | 3  | n.s.    |
|                                           | High      | 2              | 0              |          |    |         |
|                                           | Medium    | 8              | 2              |          |    |         |
|                                           | Low       | 50             | 59             |          |    |         |
| Vulnerability to disease                  | Very High | 3              | 0              | 16,067   | 3  | < .001  |
|                                           | High      | 5              | 0              |          |    |         |
|                                           | Medium    | 16             | 6              |          |    |         |
|                                           | Low       | 37             | 55             |          |    |         |
| Entanglement/Underdeveloped self          | Very High | 2              | 0              | 15,313   | 3  | < .005  |
|                                           | High      | 5              | 1              |          |    |         |
|                                           | Medium    | 16             | 4              |          |    |         |
|                                           | Low       | 38             | 56             |          |    |         |
| Submission                                | Very High | 3              | 0              | 10,34    | 3  | < .05   |
|                                           | High      | 5              | 1              |          |    |         |
|                                           | Medium    | 9              | 3              |          |    |         |
|                                           | Low       | 44             | 57             |          |    |         |
| Self-sacrifice                            | Very High | 30             | 13             | 10,885   | 3  | < .05   |
|                                           | High      | 12             | 16             |          |    |         |
|                                           | Medium    | 11             | 16             |          |    |         |
|                                           | Low       | 8              | 16             |          |    |         |
| Emotional inhibition                      | Very High | 5              | 1              | 17,458   | 3  | < .001  |
|                                           | High      | 10             | 1              |          |    |         |
|                                           | Medium    | 12             | 5              |          |    |         |
|                                           | Low       | 34             | 54             |          |    |         |
| Strict Standards /Hypercriticism          | Very High | 13             | 3              | 10,17    | 3  | < .05   |
|                                           | High      | 15             | 10             |          |    |         |
|                                           | Medium    | 11             | 18             |          |    |         |
|                                           | Low       | 22             | 30             |          |    |         |
| Claims/Grandiosity                        | Very High | 11             | 0              | 30,586   | 3  | < .0001 |
|                                           | High      | 15             | 1              |          |    |         |
|                                           | Medium    | 7              | 17             |          |    |         |
|                                           | Low       | 28             | 43             |          |    |         |
| Insufficient Self-control/self-discipline | Very High | 9              | 1              | 14,774   | 3  | < .005  |
|                                           | High      | 7              | 1              |          |    |         |
|                                           | Medium    | 11             | 8              |          |    |         |
|                                           | Low       | 34             | 51             |          |    |         |
| Search for Approval/ Acknowledgment       | Very High | 3              | 0              | 19,752   | 3  | < .0001 |
|                                           | High      | 3              | 0              |          |    |         |
|                                           | Medium    | 11             | 0              |          |    |         |
|                                           | Low       | 44             | 61             |          |    |         |
| Negativity/Pessimism                      | Very High | 5              | 0              | 21,741   | 3  | < .0001 |
|                                           | High      | 10             | 1              |          |    |         |
|                                           | Medium    | 12             | 4              |          |    |         |
|                                           | Low       | 34             | 56             |          |    |         |
| Punishment                                | Very High | 5              | 2              | 18,954   | 3  | < .0001 |
|                                           | High      | 11             | 1              |          |    |         |
|                                           | Medium    | 20             | 11             |          |    |         |
|                                           | Low       | 25             | 47             |          |    |         |

**Table S3.** Differences in the frequencies of activated schemes in the high and low inflexibility group. YSQ-L3: Young Schema Questionnaire; A-INF: high inflexibility group; B-INF: low inflexibility group; f: frequency. Chi-squared test of Pearson.

| Activated schemes YSQ-L3                  |           | B-INF (N = 61) | A-INF (N = 62) | $\chi^2$ | df | p       |
|-------------------------------------------|-----------|----------------|----------------|----------|----|---------|
|                                           |           | f              | f              |          |    |         |
| Emotional Deprivation                     | Very High | 1              | 9              | 16,686   | 3  | < .001  |
|                                           | High      | 4              | 12             |          |    |         |
|                                           | Medium    | 5              | 12             |          |    |         |
|                                           | Low       | 48             | 31             |          |    |         |
| Abandonment                               | Very High | 2              | 11             | 21,626   | 3  | < .0001 |
|                                           | High      | 2              | 13             |          |    |         |
|                                           | Medium    | 4              | 10             |          |    |         |
|                                           | Low       | 50             | 30             |          |    |         |
| Distrust/Abuse                            | Very High | 3              | 9              | 11,176   | 3  | < .05   |
|                                           | High      | 1              | 9              |          |    |         |
|                                           | Medium    | 14             | 17             |          |    |         |
|                                           | Low       | 40             | 29             |          |    |         |
| Social exclusion/Alienation               | Very High | 1              | 3              | 16,074   | 3  | < .001  |
|                                           | High      | 0              | 6              |          |    |         |
|                                           | Medium    | 4              | 16             |          |    |         |
|                                           | Low       | 53             | 39             |          |    |         |
| Inadequacy/Shame                          | Very High | 0              | 1              | 5,393    | 3  | < .145  |
|                                           | High      | 0              | 2              |          |    |         |
|                                           | Medium    | 1              | 5              |          |    |         |
|                                           | Low       | 57             | 56             |          |    |         |
| Failure                                   | Very High | 0              | 2              | 9,481    | 3  | < .05   |
|                                           | High      | 2              | 7              |          |    |         |
|                                           | Medium    | 1              | 7              |          |    |         |
|                                           | Low       | 55             | 48             |          |    |         |
| Dependence/Incompetence                   | Very High | 0              | 1              | 6,403    | 3  | > .05   |
|                                           | High      | 0              | 2              |          |    |         |
|                                           | Medium    | 2              | 8              |          |    |         |
|                                           | Low       | 56             | 53             |          |    |         |
| Vulnerability to disease                  | Very High | 0              | 3              | 8,08     | 3  | < .05   |
|                                           | High      | 0              | 5              |          |    |         |
|                                           | Medium    | 10             | 12             |          |    |         |
|                                           | Low       | 48             | 44             |          |    |         |
| Entanglement/Underdeveloped self          | Very High | 0              | 2              | 10,461   | 3  | < .05   |
|                                           | High      | 1              | 5              |          |    |         |
|                                           | Medium    | 5              | 15             |          |    |         |
|                                           | Low       | 52             | 42             |          |    |         |
| Submission                                | Very High | 1              | 2              | 9,546    | 3  | < .05   |
|                                           | High      | 0              | 6              |          |    |         |
|                                           | Medium    | 3              | 9              |          |    |         |
|                                           | Low       | 54             | 47             |          |    |         |
| Self-sacrifice                            | Very High | 18             | 25             | 1,051    | 3  | > .05   |
|                                           | High      | 14             | 14             |          |    |         |
|                                           | Medium    | 13             | 14             |          |    |         |
|                                           | Low       | 13             | 11             |          |    |         |
| Emotional inhibition                      | Very High | 0              | 6              | 24,792   | 3  | < .0001 |
|                                           | High      | 1              | 10             |          |    |         |
|                                           | Medium    | 3              | 14             |          |    |         |
|                                           | Low       | 54             | 34             |          |    |         |
| Strict Standards /Hypercriticism          | Very High | 6              | 10             | 1,687    | 3  | > .05   |
|                                           | High      | 11             | 14             |          |    |         |
|                                           | Medium    | 13             | 16             |          |    |         |
|                                           | Low       | 28             | 24             |          |    |         |
| Claims/Grandiosity                        | Very High | 1              | 10             | 12,804   | 3  | < .005  |
|                                           | High      | 4              | 12             |          |    |         |
|                                           | Medium    | 12             | 12             |          |    |         |
|                                           | Low       | 41             | 30             |          |    |         |
| Insufficient Self-control/self-discipline | Very High | 1              | 9              | 12,703   | 3  | < .005  |
|                                           | High      | 2              | 6              |          |    |         |
|                                           | Medium    | 6              | 13             |          |    |         |
|                                           | Low       | 49             | 36             |          |    |         |
| Search for Approval/ Acknowledgment       | Very High | 0              | 3              | 8,236    | 3  | < .05   |
|                                           | High      | 0              | 3              |          |    |         |
|                                           | Medium    | 3              | 8              |          |    |         |
|                                           | Low       | 55             | 50             |          |    |         |
| Negativity/Pessimism                      | Very High | 0              | 5              | 18,928   | 3  | < .0001 |
|                                           | High      | 0              | 11             |          |    |         |
|                                           | Medium    | 6              | 10             |          |    |         |
|                                           | Low       | 52             | 38             |          |    |         |
| Punishment                                | Very High | 2              | 5              | 6,632    | 3  | > .05   |
|                                           | High      | 5              | 7              |          |    |         |
|                                           | Medium    | 10             | 21             |          |    |         |
|                                           | Low       | 41             | 31             |          |    |         |

**Table S4.** Scores of AAQ-II, Idea Inventory pre- and post treatment. M= mean; S.D.= Standard deviation. T-test for paired samples

|                           | Pre-treatment |        | Post-treatment |        |        |    |        |
|---------------------------|---------------|--------|----------------|--------|--------|----|--------|
| Variables (N=71)          | M             | S.D.   | M              | S.D.   | t      | df | p      |
| Experimental Group (N=71) |               |        |                |        |        |    |        |
| AAQ-II                    | 28,8          | 9,585  | 26,37          | 9,011  | -14,47 | 70 | <.0001 |
| Idea                      | 69,35         | 11,084 | 81,94          | 10,44  | 3,7    | 70 | <.0001 |
| Control Group (N=51)      |               |        |                |        |        |    |        |
| AAQ-II                    | 30,82         | 10,303 | 31,43          | 9,976  | 0,95   | 50 | > .05  |
| Idea                      | 68,88         | 11,461 | 68,39          | 12,045 | -1,97  | 50 | >.05   |
